# Supplementary material for: Molecular dynamics simulation and experimental study into effect of temperature on hardness of ice abrasives
Source: Frontiers journal article supplement (doi:10.3389/feart.2022.1114421), 2023-01-10
Supplement: Data_Sheet_1.xlsx [file Data_Sheet_1.xlsx]

## Sheet: probability
angle/°	T=153K	T=163K	T=173K	T=183K	T=193K	T=203K	T=213K	T=233K	T=253K
0.5	0.0244912	0.0229271	0.0216607	0.0204591	0.0198964	0.0187724	0.0180459	0.0162128	0.0149093
1.5	0.0696988	0.0657391	0.0620071	0.0587214	0.0572	0.0541823	0.0521206	0.0471305	0.0433419
2.5	0.104959	0.0995119	0.0945768	0.0899126	0.0876867	0.0833706	0.0805865	0.0732374	0.0677016
3.5	0.126222	0.120768	0.115537	0.110817	0.108439	0.103771	0.100707	0.0924118	0.0864716
4.5	0.133049	0.128637	0.124493	0.120586	0.118006	0.114109	0.111489	0.103881	0.0981046
5.5	0.126577	0.124414	0.121999	0.11934	0.117482	0.114852	0.112934	0.107113	0.102482
6.5	0.111154	0.111048	0.110783	0.11002	0.108952	0.107869	0.106958	0.103628	0.100761
7.5	0.0910603	0.0929323	0.0941316	0.0951021	0.0949118	0.0952924	0.0955489	0.0949024	0.0937969
8.5	0.070051	0.0731306	0.0757631	0.077856	0.0781961	0.0799716	0.0811968	0.082858	0.0835475
9.5	0.0508434	0.0544566	0.0576331	0.0604729	0.0616619	0.0641134	0.0658515	0.0692967	0.0715796
10.5	0.0350309	0.038632	0.0419336	0.0449942	0.0464284	0.0493644	0.0512401	0.0557533	0.0590637
11.5	0.0229552	0.026072	0.0290917	0.0321157	0.0336874	0.0365047	0.0383999	0.0434145	0.0471734
12.5	0.0144041	0.0168941	0.0194213	0.0220037	0.0234388	0.0260515	0.0278365	0.0327466	0.0365496
13.5	0.00868248	0.0105049	0.0124825	0.0145045	0.0158928	0.0180038	0.0195643	0.024004	0.0276372
14.5	0.00498666	0.00630056	0.00778467	0.0092644	0.0104616	0.0121596	0.0133198	0.0171693	0.0202865
15.5	0.00277255	0.00364376	0.00463665	0.00572745	0.00670019	0.0079945	0.0088698	0.0120131	0.014648
16.5	0.00150329	0.00205044	0.00270108	0.00346386	0.0042124	0.00510918	0.00577434	0.00817584	0.010306
17.5	0.000788423	0.0011225	0.00154715	0.00204843	0.00261317	0.00324897	0.00367233	0.00552669	0.00715393
18.5	0.000393093	0.000595907	0.000852222	0.00115918	0.00158608	0.00201871	0.00229867	0.0036784	0.00491051
19.5	0.000193364	0.000310933	0.000466612	0.000653111	0.00097732	0.00124094	0.00142697	0.00240662	0.00329284
20.5	9.74728e-05	0.000155949	0.000243624	0.000367404	0.00059437	0.000761497	0.000856807	0.00156123	0.00220006
21.5	4.55156e-05	7.69137e-05	0.000127598	0.000195061	0.000361306	0.000466557	0.000526845	0.00101297	0.00144719
22.5	2.26421e-05	3.94983e-05	6.39533e-05	0.000103259	0.000216436	0.000285682	0.000313993	0.000660678	0.000955869
23.5	9.25741e-06	1.8592e-05	3.22467e-05	5.52745e-05	0.000136073	0.000177674	0.000189129	0.000422115	0.000613765
24.5	4.47441e-06	9.29598e-06	1.58533e-05	2.93152e-05	9.07412e-05	0.000110747	0.000111479	0.000280381	0.000405602
25.5	2.70008e-06	4.20441e-06	7.63737e-06	1.52362e-05	5.88737e-05	7.2867e-05	6.7196e-05	0.000184979	0.000261323
26.5	8.48596e-07	1.81291e-06	4.55156e-06	6.28733e-06	4.18984e-05	4.71379e-05	4.09656e-05	0.000122676	0.00016812
27.5	5.01443e-07	8.10024e-07	2.23721e-06	3.31724e-06	2.89353e-05	3.24411e-05	2.62304e-05	8.34431e-05	0.000109637
28.5	7.71451e-08	2.70008e-07	5.78588e-07	1.89006e-06	2.29939e-05	2.66549e-05	1.64325e-05	6.18011e-05	7.27568e-05
29.5	7.71451e-08	3.85726e-08	3.0858e-07	8.48596e-07	1.75927e-05	1.88629e-05	1.12251e-05	4.84919e-05	4.77201e-05

## Sheet: Hardness
T/K	Mohs hardness		T/K	HLD
163	4		261	220
173	4		255	230
183	3.5		248	244
193	3.5		241	258
203	3.5		234	269
213	3		227	285
223	3		221	316
233	2.5		215	325
243	2.5		206	344
253	2		195	362
263	2		188	375
			181	389
			170	420
			165	432

## Sheet: Forces
T/K	Van der Waals forces/(KJ/mol）	Electrostatic forces/(KJ/mol）
153	56402.3	244229
163	56050.2	243123
173	55661.3	242030
183	55307.4	240976
193	54674.3	239161
203	54289.8	238004
213	54062.9	237403
233	53137.3	234573
253	52469	232523

## Sheet: RDF
r/nm	T=153K	T=163K	T=173K	T=183K	T=193K	T=203K	T=213K	T=233K	T=253K
0.24	0	0	0	0	0	0	0	0.001	0.001
0.242	0	0	0	0	0	0	0	0	0.001
0.244	0	0	0	0	0	0	0	0.001	0
0.246	0	0	0	0	0	0	0	0	0
0.248	0	0	0	0	0	0	0	0.001	0.001
0.25	0	0	0	0	0.001	0.001	0	0.001	0.001
0.252	0	0	0	0	0.001	0.001	0	0.001	0.001
0.254	0	0	0	0	0.001	0.001	0	0.001	0.001
0.256	0	0	0	0	0.002	0.001	0.001	0.002	0.002
0.258	0	0	0	0	0.002	0.002	0.001	0.003	0.003
0.26	0	0	0	0	0.003	0.003	0.002	0.004	0.004
0.262	0	0	0	0	0.004	0.004	0.002	0.005	0.006
0.264	0	0	0.001	0.001	0.006	0.006	0.004	0.008	0.009
0.266	0	0.001	0.001	0.002	0.008	0.008	0.006	0.011	0.013
0.268	0.001	0.001	0.002	0.003	0.011	0.012	0.009	0.016	0.019
0.27	0.002	0.003	0.004	0.005	0.015	0.017	0.014	0.024	0.027
0.272	0.003	0.005	0.007	0.009	0.022	0.025	0.022	0.034	0.04
0.274	0.006	0.009	0.012	0.015	0.032	0.036	0.034	0.049	0.056
0.276	0.011	0.015	0.02	0.024	0.047	0.053	0.051	0.071	0.081
0.278	0.021	0.026	0.033	0.04	0.069	0.077	0.077	0.102	0.115
0.28	0.036	0.045	0.054	0.064	0.102	0.113	0.113	0.145	0.161
0.282	0.062	0.075	0.088	0.102	0.15	0.165	0.167	0.203	0.223
0.284	0.105	0.123	0.14	0.158	0.219	0.236	0.24	0.282	0.304
0.286	0.172	0.195	0.217	0.239	0.313	0.334	0.339	0.382	0.407
0.288	0.272	0.3	0.326	0.352	0.438	0.461	0.466	0.51	0.533
0.29	0.415	0.447	0.475	0.503	0.601	0.622	0.626	0.666	0.683
0.292	0.606	0.637	0.666	0.69	0.796	0.813	0.815	0.843	0.853
0.294	0.851	0.876	0.9	0.918	1.024	1.033	1.029	1.043	1.041
0.296	1.14	1.155	1.165	1.173	1.271	1.272	1.26	1.252	1.235
0.298	1.456	1.454	1.452	1.445	1.525	1.51	1.495	1.461	1.429
0.3	1.779	1.756	1.733	1.711	1.765	1.735	1.713	1.653	1.608
0.302	2.086	2.043	2.001	1.964	1.984	1.942	1.913	1.831	1.772
0.304	2.331	2.27	2.216	2.162	2.149	2.097	2.06	1.965	1.893
0.306	2.519	2.446	2.378	2.315	2.268	2.21	2.173	2.067	1.99
0.308	2.614	2.538	2.465	2.399	2.321	2.263	2.228	2.119	2.044
0.31	2.625	2.55	2.478	2.412	2.316	2.26	2.231	2.128	2.057
0.312	2.552	2.487	2.426	2.369	2.256	2.21	2.186	2.095	2.033
0.314	2.412	2.36	2.31	2.266	2.153	2.118	2.096	2.027	1.979
0.316	2.206	2.175	2.143	2.111	2.005	1.983	1.972	1.924	1.89
0.318	1.975	1.96	1.946	1.93	1.842	1.83	1.829	1.803	1.783
0.32	1.722	1.727	1.73	1.73	1.662	1.664	1.669	1.669	1.663
0.322	1.471	1.493	1.512	1.527	1.482	1.497	1.508	1.528	1.538
0.324	1.228	1.262	1.295	1.323	1.301	1.327	1.34	1.382	1.404
0.326	1.017	1.062	1.103	1.139	1.143	1.176	1.192	1.25	1.281
0.328	0.834	0.885	0.932	0.976	0.996	1.036	1.055	1.125	1.162
0.33	0.694	0.746	0.795	0.84	0.878	0.918	0.937	1.014	1.058
0.332	0.589	0.641	0.689	0.734	0.78	0.822	0.839	0.918	0.964
0.334	0.526	0.574	0.62	0.664	0.713	0.752	0.767	0.846	0.891
0.336	0.5	0.541	0.582	0.622	0.67	0.706	0.718	0.793	0.835
0.338	0.505	0.539	0.574	0.607	0.649	0.682	0.691	0.758	0.795
0.34	0.538	0.566	0.592	0.618	0.65	0.677	0.684	0.739	0.771
0.342	0.593	0.613	0.63	0.65	0.668	0.688	0.693	0.736	0.76
0.344	0.667	0.678	0.689	0.7	0.703	0.718	0.719	0.749	0.767
0.346	0.753	0.757	0.758	0.762	0.749	0.756	0.755	0.771	0.781
0.348	0.849	0.843	0.836	0.833	0.8	0.801	0.799	0.801	0.803
0.35	0.947	0.933	0.918	0.908	0.859	0.852	0.847	0.837	0.832
0.352	1.043	1.021	0.999	0.98	0.917	0.903	0.896	0.876	0.864
0.354	1.134	1.105	1.076	1.051	0.972	0.953	0.946	0.914	0.898
0.356	1.217	1.182	1.148	1.118	1.027	1.005	0.996	0.956	0.934
0.358	1.281	1.241	1.203	1.17	1.069	1.044	1.036	0.988	0.963
0.36	1.33	1.288	1.246	1.212	1.106	1.079	1.07	1.018	0.99
0.362	1.357	1.315	1.274	1.238	1.134	1.103	1.096	1.041	1.012
0.364	1.36	1.323	1.282	1.246	1.146	1.118	1.11	1.056	1.028
0.366	1.344	1.308	1.273	1.24	1.149	1.121	1.115	1.062	1.035
0.368	1.312	1.278	1.25	1.222	1.141	1.117	1.112	1.063	1.039
0.37	1.254	1.229	1.207	1.184	1.121	1.1	1.097	1.054	1.033
0.372	1.178	1.162	1.147	1.131	1.088	1.072	1.069	1.036	1.019
0.374	1.093	1.087	1.08	1.072	1.049	1.038	1.039	1.013	1
0.376	0.994	0.996	0.998	0.998	0.998	0.991	0.993	0.98	0.972
0.378	0.897	0.908	0.919	0.926	0.947	0.947	0.951	0.947	0.947
0.38	0.799	0.818	0.836	0.85	0.89	0.895	0.9	0.908	0.912
0.382	0.703	0.729	0.753	0.773	0.832	0.844	0.849	0.867	0.878
0.384	0.616	0.647	0.677	0.702	0.775	0.792	0.799	0.826	0.843
0.386	0.54	0.574	0.606	0.635	0.72	0.743	0.749	0.787	0.806
0.388	0.476	0.512	0.546	0.577	0.672	0.696	0.704	0.749	0.773
0.39	0.427	0.463	0.499	0.531	0.63	0.658	0.665	0.715	0.745
0.392	0.393	0.429	0.464	0.497	0.597	0.625	0.633	0.688	0.718
0.394	0.372	0.406	0.44	0.472	0.57	0.6	0.605	0.664	0.696
0.396	0.366	0.398	0.43	0.46	0.554	0.584	0.589	0.648	0.681
0.398	0.374	0.403	0.432	0.46	0.547	0.577	0.581	0.639	0.671
0.4	0.394	0.419	0.445	0.472	0.549	0.577	0.581	0.637	0.668
0.402	0.425	0.448	0.471	0.494	0.56	0.587	0.589	0.643	0.672
0.404	0.466	0.486	0.506	0.526	0.581	0.605	0.606	0.656	0.683
0.406	0.516	0.531	0.548	0.566	0.609	0.63	0.63	0.675	0.7
0.408	0.574	0.588	0.602	0.615	0.645	0.664	0.663	0.703	0.724
0.41	0.639	0.648	0.659	0.669	0.686	0.701	0.7	0.733	0.751
0.412	0.71	0.716	0.725	0.732	0.733	0.747	0.745	0.772	0.787
0.414	0.784	0.788	0.792	0.796	0.786	0.796	0.793	0.813	0.825
0.416	0.866	0.865	0.867	0.867	0.843	0.851	0.848	0.862	0.869
0.418	0.946	0.943	0.942	0.938	0.903	0.907	0.905	0.912	0.916
0.42	1.029	1.022	1.018	1.011	0.966	0.968	0.964	0.965	0.965
0.422	1.112	1.102	1.095	1.086	1.031	1.03	1.026	1.021	1.017
0.424	1.194	1.181	1.171	1.16	1.094	1.09	1.086	1.074	1.069
0.426	1.275	1.259	1.247	1.232	1.162	1.155	1.15	1.132	1.125
0.428	1.35	1.333	1.318	1.301	1.226	1.216	1.213	1.188	1.175
0.43	1.42	1.402	1.383	1.365	1.287	1.275	1.271	1.241	1.227
0.432	1.49	1.468	1.449	1.429	1.35	1.335	1.332	1.297	1.279
0.434	1.552	1.529	1.507	1.487	1.408	1.39	1.388	1.347	1.329
0.436	1.602	1.579	1.556	1.534	1.459	1.44	1.437	1.392	1.372
0.438	1.65	1.626	1.603	1.58	1.509	1.488	1.487	1.438	1.416
0.44	1.689	1.666	1.642	1.621	1.557	1.532	1.532	1.48	1.456
0.442	1.719	1.696	1.672	1.65	1.592	1.568	1.568	1.514	1.492
0.444	1.741	1.719	1.695	1.675	1.628	1.602	1.602	1.547	1.523
0.446	1.755	1.735	1.713	1.693	1.654	1.629	1.631	1.574	1.552
0.448	1.76	1.743	1.721	1.702	1.674	1.648	1.649	1.594	1.572
0.45	1.765	1.748	1.729	1.711	1.692	1.666	1.67	1.614	1.593
0.452	1.756	1.741	1.724	1.709	1.699	1.673	1.677	1.624	1.603
0.454	1.743	1.731	1.715	1.702	1.7	1.677	1.682	1.63	1.61
0.456	1.727	1.716	1.703	1.691	1.697	1.675	1.679	1.631	1.615
0.458	1.707	1.698	1.686	1.678	1.689	1.667	1.673	1.627	1.613
0.46	1.682	1.673	1.665	1.656	1.674	1.655	1.662	1.621	1.606
0.462	1.655	1.649	1.64	1.633	1.656	1.639	1.646	1.609	1.598
0.464	1.628	1.623	1.616	1.611	1.635	1.621	1.629	1.595	1.586
0.466	1.596	1.593	1.587	1.582	1.61	1.598	1.604	1.577	1.571
0.468	1.565	1.562	1.556	1.553	1.581	1.572	1.58	1.556	1.552
0.47	1.532	1.527	1.524	1.521	1.55	1.544	1.551	1.533	1.529
0.472	1.497	1.494	1.49	1.49	1.518	1.515	1.522	1.509	1.509
0.474	1.46	1.457	1.456	1.455	1.484	1.484	1.491	1.483	1.484
0.476	1.423	1.421	1.421	1.422	1.453	1.454	1.461	1.457	1.461
0.478	1.381	1.382	1.382	1.383	1.416	1.42	1.426	1.428	1.432
0.48	1.343	1.344	1.345	1.349	1.385	1.39	1.396	1.401	1.408
0.482	1.303	1.305	1.31	1.315	1.355	1.36	1.367	1.375	1.382
0.484	1.26	1.265	1.271	1.277	1.323	1.33	1.336	1.348	1.356
0.486	1.22	1.227	1.235	1.241	1.294	1.301	1.306	1.321	1.33
0.488	1.18	1.189	1.199	1.207	1.267	1.276	1.281	1.297	1.306
0.49	1.14	1.152	1.165	1.175	1.239	1.249	1.253	1.271	1.281
0.492	1.104	1.119	1.132	1.144	1.216	1.226	1.229	1.248	1.257
0.494	1.072	1.087	1.102	1.115	1.192	1.201	1.205	1.225	1.235
0.496	1.042	1.059	1.075	1.088	1.17	1.179	1.181	1.203	1.212
0.498	1.02	1.036	1.052	1.065	1.15	1.159	1.16	1.182	1.191
0.5	0.999	1.016	1.032	1.045	1.13	1.139	1.14	1.161	1.17
0.502	0.984	0.999	1.015	1.027	1.11	1.119	1.12	1.141	1.149
0.504	0.974	0.988	1.001	1.014	1.093	1.101	1.101	1.121	1.13
0.506	0.967	0.98	0.993	1.002	1.076	1.082	1.081	1.104	1.111
0.508	0.964	0.974	0.984	0.993	1.058	1.064	1.064	1.085	1.092
0.51	0.962	0.969	0.977	0.984	1.039	1.045	1.045	1.065	1.072
0.512	0.961	0.966	0.972	0.977	1.023	1.029	1.028	1.047	1.055
0.514	0.962	0.964	0.968	0.971	1.004	1.011	1.01	1.028	1.036
0.516	0.96	0.961	0.963	0.966	0.988	0.994	0.994	1.012	1.018
0.518	0.958	0.957	0.959	0.96	0.973	0.978	0.977	0.994	1.002
0.52	0.952	0.952	0.951	0.953	0.954	0.961	0.96	0.977	0.985
0.522	0.948	0.946	0.945	0.946	0.941	0.947	0.945	0.963	0.969
0.524	0.939	0.937	0.937	0.938	0.926	0.932	0.931	0.948	0.954
0.526	0.929	0.929	0.928	0.929	0.912	0.918	0.918	0.934	0.94
0.528	0.919	0.92	0.921	0.922	0.901	0.906	0.905	0.922	0.929
0.53	0.909	0.912	0.912	0.914	0.891	0.896	0.896	0.911	0.918
0.532	0.899	0.901	0.904	0.906	0.881	0.887	0.886	0.9	0.907
0.534	0.89	0.894	0.897	0.901	0.875	0.879	0.879	0.892	0.899
0.536	0.885	0.89	0.892	0.896	0.87	0.875	0.873	0.887	0.894
0.538	0.88	0.885	0.888	0.892	0.866	0.87	0.869	0.882	0.888
0.54	0.878	0.883	0.887	0.891	0.864	0.867	0.866	0.878	0.884
0.542	0.88	0.884	0.889	0.892	0.865	0.869	0.866	0.877	0.882
0.544	0.885	0.89	0.892	0.897	0.866	0.87	0.868	0.877	0.881
0.546	0.891	0.897	0.899	0.903	0.871	0.874	0.872	0.879	0.884
0.548	0.902	0.905	0.908	0.911	0.875	0.877	0.875	0.882	0.885
0.55	0.914	0.917	0.919	0.922	0.882	0.884	0.882	0.887	0.89
0.552	0.931	0.932	0.934	0.935	0.89	0.892	0.889	0.893	0.895
0.554	0.948	0.948	0.949	0.95	0.899	0.899	0.899	0.9	0.902
0.556	0.967	0.967	0.967	0.967	0.909	0.909	0.908	0.908	0.909
0.558	0.985	0.984	0.984	0.983	0.919	0.918	0.918	0.917	0.916
0.56	1.008	1.006	1.005	1.002	0.932	0.93	0.93	0.927	0.925
0.562	1.03	1.027	1.024	1.021	0.945	0.942	0.942	0.937	0.934
0.564	1.054	1.05	1.045	1.041	0.957	0.955	0.954	0.948	0.944
0.566	1.076	1.07	1.065	1.058	0.971	0.967	0.967	0.957	0.954
0.568	1.098	1.09	1.083	1.076	0.982	0.979	0.979	0.968	0.962
0.57	1.119	1.11	1.102	1.093	0.996	0.99	0.99	0.977	0.971
0.572	1.139	1.127	1.117	1.107	1.008	1.001	1.002	0.987	0.98
0.574	1.155	1.141	1.131	1.119	1.019	1.011	1.011	0.994	0.987
0.576	1.167	1.153	1.141	1.128	1.03	1.021	1.022	1.001	0.992
0.578	1.176	1.161	1.148	1.135	1.038	1.028	1.028	1.007	0.998
0.58	1.181	1.166	1.152	1.137	1.044	1.034	1.035	1.011	1.001
0.582	1.179	1.163	1.148	1.134	1.048	1.037	1.037	1.013	1.002
0.584	1.171	1.156	1.141	1.128	1.049	1.036	1.037	1.013	1.001
0.586	1.16	1.145	1.131	1.118	1.048	1.035	1.036	1.01	0.999
0.588	1.141	1.128	1.114	1.102	1.042	1.029	1.03	1.004	0.994
0.59	1.117	1.105	1.093	1.082	1.034	1.021	1.023	0.997	0.987
0.592	1.087	1.077	1.067	1.058	1.021	1.009	1.011	0.986	0.977
0.594	1.055	1.047	1.039	1.032	1.007	0.995	0.997	0.974	0.966
0.596	1.016	1.012	1.006	1.001	0.988	0.977	0.979	0.959	0.951
0.598	0.976	0.973	0.969	0.967	0.967	0.956	0.959	0.943	0.935
0.6	0.931	0.931	0.931	0.93	0.94	0.932	0.935	0.92	0.915
0.602	0.887	0.89	0.892	0.893	0.913	0.907	0.91	0.9	0.897
0.604	0.841	0.847	0.85	0.855	0.882	0.879	0.881	0.875	0.874
0.606	0.795	0.803	0.809	0.814	0.85	0.849	0.852	0.85	0.85
0.608	0.751	0.76	0.768	0.776	0.816	0.817	0.82	0.824	0.827
0.61	0.707	0.719	0.728	0.737	0.782	0.785	0.788	0.796	0.801
0.612	0.666	0.678	0.689	0.7	0.747	0.753	0.756	0.769	0.776
0.614	0.627	0.64	0.653	0.665	0.713	0.721	0.724	0.742	0.751
0.616	0.591	0.605	0.619	0.632	0.679	0.69	0.693	0.715	0.725
0.618	0.559	0.573	0.588	0.601	0.648	0.66	0.663	0.69	0.701
0.62	0.529	0.544	0.56	0.574	0.617	0.632	0.635	0.665	0.679
0.622	0.503	0.519	0.534	0.549	0.591	0.607	0.608	0.643	0.657
0.624	0.482	0.497	0.514	0.528	0.566	0.584	0.586	0.622	0.638
0.626	0.465	0.48	0.496	0.51	0.546	0.565	0.565	0.604	0.621
0.628	0.452	0.467	0.482	0.496	0.53	0.55	0.549	0.59	0.606
0.63	0.443	0.458	0.472	0.486	0.517	0.537	0.536	0.578	0.595
0.632	0.438	0.451	0.466	0.48	0.508	0.528	0.527	0.569	0.586
0.634	0.438	0.451	0.465	0.477	0.505	0.524	0.522	0.564	0.58
0.636	0.442	0.454	0.467	0.479	0.506	0.524	0.522	0.563	0.578
0.638	0.449	0.461	0.473	0.484	0.511	0.529	0.526	0.565	0.579
0.64	0.461	0.472	0.483	0.493	0.52	0.538	0.533	0.571	0.584
0.642	0.477	0.486	0.496	0.505	0.534	0.55	0.545	0.58	0.591
0.644	0.496	0.504	0.513	0.521	0.552	0.567	0.561	0.593	0.602
0.646	0.519	0.526	0.533	0.54	0.573	0.586	0.58	0.608	0.616
0.648	0.544	0.55	0.556	0.563	0.599	0.609	0.603	0.627	0.633
0.65	0.573	0.578	0.582	0.588	0.628	0.636	0.629	0.649	0.652
0.652	0.604	0.608	0.611	0.614	0.658	0.664	0.656	0.672	0.673
0.654	0.638	0.64	0.641	0.644	0.691	0.695	0.687	0.699	0.697
0.656	0.673	0.674	0.674	0.675	0.726	0.727	0.72	0.726	0.722
0.658	0.711	0.71	0.708	0.708	0.762	0.761	0.754	0.755	0.749
0.66	0.749	0.747	0.744	0.743	0.799	0.796	0.788	0.785	0.777
0.662	0.788	0.784	0.78	0.777	0.836	0.831	0.823	0.815	0.806
0.664	0.827	0.822	0.816	0.812	0.873	0.866	0.858	0.846	0.835
0.666	0.867	0.861	0.854	0.847	0.909	0.901	0.893	0.878	0.865
0.668	0.905	0.897	0.889	0.882	0.943	0.933	0.926	0.906	0.892
0.67	0.943	0.934	0.924	0.917	0.977	0.965	0.959	0.936	0.921
0.672	0.98	0.97	0.959	0.95	1.009	0.996	0.989	0.965	0.948
0.674	1.013	1.002	0.991	0.981	1.037	1.023	1.017	0.99	0.973
0.676	1.046	1.034	1.022	1.011	1.064	1.049	1.045	1.016	0.999
0.678	1.074	1.062	1.049	1.038	1.087	1.073	1.068	1.037	1.02
0.68	1.1	1.088	1.075	1.063	1.108	1.093	1.089	1.058	1.041
0.682	1.123	1.11	1.097	1.085	1.126	1.111	1.108	1.076	1.06
0.684	1.142	1.129	1.116	1.105	1.14	1.125	1.122	1.092	1.076
0.686	1.158	1.145	1.133	1.121	1.152	1.137	1.136	1.105	1.091
0.688	1.168	1.157	1.145	1.134	1.158	1.146	1.145	1.115	1.101
0.69	1.178	1.166	1.155	1.145	1.165	1.153	1.153	1.124	1.111
0.692	1.181	1.171	1.161	1.151	1.167	1.156	1.155	1.129	1.119
0.694	1.182	1.174	1.165	1.156	1.166	1.157	1.157	1.133	1.123
0.696	1.18	1.173	1.165	1.157	1.163	1.155	1.156	1.134	1.126
0.698	1.176	1.17	1.164	1.158	1.158	1.152	1.153	1.134	1.126
0.7	1.169	1.165	1.158	1.153	1.151	1.146	1.148	1.131	1.126
0.702	1.161	1.157	1.154	1.15	1.143	1.139	1.141	1.127	1.124
0.704	1.15	1.147	1.145	1.144	1.134	1.131	1.133	1.121	1.119
0.706	1.138	1.138	1.137	1.135	1.123	1.121	1.123	1.114	1.113
0.708	1.128	1.128	1.128	1.127	1.112	1.112	1.114	1.108	1.109
0.71	1.114	1.115	1.116	1.116	1.098	1.099	1.103	1.098	1.1
0.712	1.102	1.104	1.105	1.107	1.086	1.088	1.091	1.089	1.092
0.714	1.088	1.091	1.094	1.096	1.072	1.075	1.078	1.078	1.082
0.716	1.076	1.079	1.082	1.084	1.059	1.063	1.065	1.068	1.072
0.718	1.065	1.068	1.072	1.075	1.047	1.052	1.054	1.058	1.064
0.72	1.053	1.057	1.061	1.064	1.035	1.039	1.041	1.047	1.053
0.722	1.042	1.046	1.05	1.055	1.022	1.027	1.029	1.037	1.044
0.724	1.032	1.037	1.041	1.045	1.011	1.017	1.018	1.027	1.035
0.726	1.023	1.027	1.032	1.036	1	1.007	1.007	1.018	1.025
0.728	1.014	1.019	1.024	1.028	0.99	0.997	0.998	1.01	1.017
0.73	1.007	1.012	1.017	1.02	0.981	0.988	0.989	1.002	1.01
0.732	1.001	1.004	1.01	1.014	0.972	0.981	0.98	0.994	1.002
0.734	0.996	1	1.004	1.009	0.967	0.974	0.974	0.989	0.996
0.736	0.992	0.995	1	1.003	0.96	0.967	0.968	0.983	0.99
0.738	0.988	0.992	0.996	1	0.956	0.964	0.963	0.979	0.986
0.74	0.988	0.991	0.995	0.998	0.954	0.961	0.961	0.976	0.984
0.742	0.986	0.99	0.993	0.996	0.952	0.96	0.959	0.974	0.98
0.744	0.987	0.99	0.994	0.996	0.953	0.96	0.959	0.974	0.98
0.746	0.989	0.991	0.994	0.996	0.955	0.961	0.96	0.975	0.98
0.748	0.993	0.994	0.997	0.999	0.958	0.964	0.963	0.977	0.982
0.75	0.996	0.997	0.999	1.001	0.963	0.968	0.967	0.98	0.983
0.752	1.002	1.002	1.004	1.005	0.97	0.974	0.973	0.985	0.987
0.754	1.007	1.008	1.009	1.01	0.978	0.981	0.98	0.99	0.992
0.756	1.014	1.014	1.015	1.016	0.986	0.989	0.988	0.996	0.997
0.758	1.021	1.021	1.022	1.023	0.997	0.999	0.997	1.003	1.004
0.76	1.029	1.029	1.029	1.029	1.007	1.009	1.007	1.012	1.012
0.762	1.038	1.038	1.038	1.039	1.02	1.02	1.019	1.02	1.02
0.764	1.047	1.047	1.047	1.047	1.033	1.031	1.031	1.032	1.029
0.766	1.056	1.056	1.056	1.056	1.045	1.043	1.042	1.041	1.038
0.768	1.068	1.068	1.068	1.067	1.059	1.056	1.055	1.052	1.048
0.77	1.079	1.078	1.078	1.077	1.072	1.068	1.067	1.062	1.058
0.772	1.09	1.091	1.089	1.088	1.086	1.081	1.081	1.074	1.068
0.774	1.102	1.102	1.1	1.099	1.099	1.093	1.092	1.084	1.079
0.776	1.116	1.114	1.113	1.112	1.112	1.106	1.106	1.095	1.089
0.778	1.129	1.127	1.125	1.122	1.124	1.116	1.117	1.105	1.099
0.78	1.142	1.14	1.137	1.134	1.134	1.127	1.128	1.115	1.108
0.782	1.155	1.152	1.148	1.145	1.144	1.137	1.138	1.124	1.117
0.784	1.168	1.164	1.16	1.155	1.154	1.146	1.147	1.132	1.124
0.786	1.181	1.176	1.171	1.166	1.163	1.154	1.156	1.14	1.133
0.788	1.193	1.186	1.181	1.175	1.168	1.161	1.162	1.146	1.139
0.79	1.202	1.196	1.188	1.182	1.174	1.165	1.167	1.151	1.144
0.792	1.211	1.203	1.196	1.189	1.178	1.17	1.172	1.155	1.149
0.794	1.217	1.21	1.201	1.195	1.181	1.173	1.175	1.159	1.153
0.796	1.221	1.211	1.204	1.197	1.181	1.173	1.176	1.16	1.155
0.798	1.221	1.213	1.205	1.198	1.18	1.174	1.177	1.161	1.157
0.8	1.221	1.212	1.205	1.199	1.179	1.173	1.176	1.162	1.158
0.802	1.217	1.21	1.202	1.196	1.176	1.171	1.173	1.161	1.158
0.804	1.21	1.203	1.197	1.191	1.17	1.167	1.17	1.157	1.156
0.806	1.201	1.195	1.19	1.186	1.165	1.162	1.166	1.154	1.153
0.808	1.188	1.184	1.181	1.176	1.157	1.155	1.159	1.149	1.149
0.81	1.176	1.173	1.171	1.169	1.152	1.151	1.154	1.145	1.147
0.812	1.161	1.159	1.158	1.156	1.142	1.142	1.145	1.138	1.14
0.814	1.145	1.145	1.145	1.145	1.134	1.135	1.138	1.133	1.136
0.816	1.127	1.129	1.131	1.131	1.125	1.126	1.13	1.126	1.13
0.818	1.111	1.114	1.117	1.119	1.117	1.119	1.122	1.12	1.124
0.82	1.092	1.096	1.101	1.104	1.106	1.109	1.112	1.112	1.117
0.822	1.077	1.082	1.087	1.091	1.098	1.102	1.105	1.105	1.111
0.824	1.061	1.066	1.073	1.077	1.089	1.093	1.096	1.098	1.104
0.826	1.045	1.052	1.06	1.065	1.08	1.085	1.088	1.091	1.098
0.828	1.033	1.04	1.047	1.053	1.073	1.078	1.08	1.084	1.091
0.83	1.021	1.029	1.036	1.042	1.065	1.071	1.073	1.078	1.085
0.832	1.011	1.018	1.026	1.033	1.059	1.064	1.066	1.071	1.079
0.834	1.004	1.011	1.018	1.024	1.053	1.059	1.061	1.067	1.074
0.836	0.997	1.004	1.011	1.018	1.048	1.054	1.056	1.062	1.069
0.838	0.993	0.999	1.006	1.012	1.044	1.049	1.05	1.057	1.064
0.84	0.991	0.997	1.003	1.009	1.041	1.047	1.048	1.055	1.061
0.842	0.99	0.996	1.001	1.006	1.039	1.044	1.044	1.051	1.057
0.844	0.991	0.996	1.001	1.005	1.037	1.042	1.042	1.049	1.054
0.846	0.994	0.998	1.002	1.006	1.037	1.04	1.041	1.047	1.053
0.848	0.997	1.001	1.004	1.008	1.037	1.041	1.04	1.046	1.051
0.85	1.002	1.005	1.007	1.01	1.037	1.04	1.04	1.045	1.049
0.852	1.008	1.01	1.012	1.014	1.038	1.041	1.04	1.046	1.049
0.854	1.015	1.017	1.017	1.019	1.04	1.042	1.041	1.046	1.049
0.856	1.023	1.023	1.023	1.024	1.042	1.044	1.043	1.047	1.049
0.858	1.031	1.031	1.03	1.031	1.045	1.046	1.046	1.049	1.051
0.86	1.04	1.039	1.038	1.037	1.048	1.049	1.048	1.051	1.052
0.862	1.047	1.046	1.044	1.043	1.05	1.051	1.05	1.052	1.053
0.864	1.056	1.053	1.051	1.05	1.054	1.055	1.053	1.055	1.055
0.866	1.064	1.061	1.058	1.055	1.058	1.057	1.056	1.058	1.058
0.868	1.072	1.068	1.065	1.062	1.061	1.061	1.06	1.061	1.06
0.87	1.078	1.074	1.07	1.067	1.066	1.064	1.062	1.064	1.062
0.872	1.083	1.079	1.076	1.072	1.069	1.067	1.066	1.067	1.065
0.874	1.088	1.083	1.08	1.076	1.072	1.07	1.069	1.069	1.066
0.876	1.091	1.087	1.083	1.079	1.076	1.073	1.072	1.071	1.069
0.878	1.094	1.09	1.087	1.083	1.079	1.077	1.075	1.074	1.071
0.88	1.094	1.091	1.087	1.083	1.081	1.078	1.077	1.075	1.073
0.882	1.095	1.092	1.089	1.085	1.084	1.081	1.08	1.078	1.075
0.884	1.093	1.091	1.088	1.085	1.086	1.082	1.081	1.08	1.077
0.886	1.091	1.089	1.087	1.084	1.087	1.083	1.083	1.08	1.077
0.888	1.088	1.087	1.084	1.083	1.088	1.084	1.084	1.082	1.078
0.89	1.085	1.084	1.083	1.081	1.089	1.085	1.085	1.082	1.078
0.892	1.079	1.079	1.078	1.077	1.088	1.083	1.084	1.081	1.077
0.894	1.075	1.075	1.075	1.074	1.087	1.083	1.084	1.08	1.077
0.896	1.07	1.071	1.071	1.07	1.086	1.082	1.083	1.08	1.076
0.898	1.064	1.065	1.065	1.065	1.083	1.08	1.081	1.077	1.075
0.9	1.059	1.06	1.06	1.061	1.081	1.077	1.078	1.076	1.073
0.902	1.052	1.054	1.055	1.055	1.077	1.073	1.075	1.072	1.07
0.904	1.047	1.049	1.05	1.051	1.074	1.071	1.072	1.069	1.067
0.906	1.041	1.043	1.044	1.045	1.069	1.066	1.068	1.065	1.063
0.908	1.036	1.037	1.038	1.04	1.064	1.061	1.063	1.061	1.059
0.91	1.028	1.03	1.032	1.033	1.058	1.054	1.057	1.056	1.053
0.912	1.024	1.026	1.027	1.028	1.052	1.049	1.052	1.051	1.05
0.914	1.018	1.019	1.02	1.022	1.045	1.043	1.046	1.045	1.045
0.916	1.013	1.014	1.016	1.018	1.038	1.036	1.039	1.039	1.039
0.918	1.007	1.008	1.009	1.011	1.031	1.029	1.032	1.032	1.032
0.92	1.002	1.004	1.005	1.007	1.024	1.023	1.026	1.027	1.027
0.922	0.996	0.997	0.999	1	1.016	1.014	1.017	1.02	1.019
0.924	0.991	0.993	0.994	0.995	1.008	1.007	1.01	1.012	1.013
0.926	0.986	0.988	0.988	0.99	1	1	1.002	1.006	1.006
0.928	0.982	0.983	0.984	0.985	0.992	0.992	0.995	0.999	1
0.93	0.977	0.978	0.98	0.981	0.984	0.985	0.987	0.991	0.992
0.932	0.973	0.974	0.974	0.976	0.976	0.977	0.979	0.984	0.985
0.934	0.969	0.97	0.97	0.972	0.969	0.969	0.971	0.977	0.978
0.936	0.965	0.966	0.966	0.967	0.962	0.963	0.964	0.97	0.971
0.938	0.961	0.962	0.962	0.963	0.954	0.955	0.957	0.963	0.965
0.94	0.958	0.959	0.958	0.96	0.947	0.949	0.949	0.956	0.958
0.942	0.955	0.955	0.956	0.956	0.941	0.943	0.943	0.95	0.952
0.944	0.951	0.952	0.952	0.953	0.935	0.937	0.937	0.944	0.946
0.946	0.948	0.948	0.949	0.948	0.928	0.93	0.93	0.937	0.939
0.948	0.944	0.945	0.945	0.945	0.923	0.925	0.925	0.931	0.933
0.95	0.942	0.942	0.942	0.943	0.918	0.92	0.919	0.927	0.928
0.952	0.938	0.938	0.938	0.938	0.912	0.914	0.914	0.92	0.922
0.954	0.936	0.936	0.936	0.936	0.908	0.911	0.91	0.916	0.917
0.956	0.932	0.931	0.932	0.932	0.904	0.906	0.904	0.911	0.912
0.958	0.929	0.929	0.928	0.928	0.899	0.902	0.9	0.906	0.908
0.96	0.924	0.924	0.924	0.924	0.895	0.897	0.896	0.901	0.903
0.962	0.921	0.921	0.921	0.921	0.893	0.895	0.893	0.898	0.899
0.964	0.917	0.917	0.917	0.917	0.889	0.892	0.89	0.894	0.895
0.966	0.913	0.913	0.913	0.913	0.886	0.888	0.886	0.89	0.891
0.968	0.909	0.908	0.909	0.908	0.883	0.885	0.883	0.886	0.887
0.97	0.905	0.904	0.904	0.904	0.88	0.882	0.88	0.883	0.884
0.972	0.899	0.899	0.899	0.899	0.877	0.879	0.876	0.879	0.88
0.974	0.894	0.894	0.894	0.894	0.873	0.875	0.874	0.876	0.877
0.976	0.889	0.889	0.89	0.89	0.871	0.873	0.871	0.873	0.874
0.978	0.883	0.883	0.884	0.884	0.867	0.869	0.868	0.869	0.871
0.98	0.878	0.878	0.879	0.88	0.865	0.867	0.865	0.867	0.868
0.982	0.871	0.872	0.873	0.874	0.861	0.863	0.862	0.864	0.865
0.984	0.866	0.866	0.868	0.87	0.858	0.86	0.859	0.861	0.863
0.986	0.859	0.86	0.863	0.864	0.855	0.857	0.856	0.858	0.86
0.988	0.854	0.856	0.858	0.861	0.851	0.854	0.854	0.856	0.858
0.99	0.847	0.849	0.853	0.855	0.847	0.85	0.85	0.853	0.854
0.992	0.843	0.846	0.85	0.852	0.846	0.848	0.848	0.851	0.853
0.994	0.838	0.841	0.845	0.848	0.842	0.845	0.845	0.848	0.85
0.996	0.835	0.838	0.842	0.845	0.84	0.843	0.842	0.847	0.849
0.998	0.831	0.835	0.84	0.842	0.838	0.841	0.84	0.845	0.847
1	0.83	0.834	0.838	0.841	0.836	0.839	0.838	0.844	0.846
1.002	0.83	0.834	0.837	0.84	0.834	0.838	0.837	0.843	0.845
1.004	0.83	0.834	0.837	0.84	0.833	0.837	0.836	0.841	0.844
1.006	0.832	0.835	0.838	0.841	0.833	0.836	0.835	0.841	0.843
1.008	0.834	0.837	0.84	0.842	0.833	0.836	0.836	0.841	0.843
1.01	0.838	0.841	0.843	0.845	0.833	0.837	0.836	0.842	0.844
1.012	0.844	0.845	0.847	0.849	0.835	0.839	0.837	0.843	0.845
1.014	0.849	0.849	0.85	0.851	0.837	0.84	0.838	0.844	0.846
1.016	0.855	0.855	0.855	0.855	0.839	0.842	0.84	0.846	0.847
1.018	0.861	0.861	0.861	0.86	0.843	0.845	0.844	0.849	0.85
1.02	0.867	0.866	0.865	0.865	0.846	0.848	0.846	0.851	0.852
1.022	0.874	0.873	0.871	0.87	0.851	0.853	0.85	0.854	0.855
1.024	0.88	0.878	0.877	0.875	0.855	0.856	0.854	0.858	0.858
1.026	0.887	0.884	0.882	0.881	0.861	0.862	0.859	0.863	0.862
1.028	0.893	0.89	0.888	0.885	0.866	0.867	0.864	0.867	0.867
1.03	0.898	0.895	0.892	0.891	0.872	0.873	0.87	0.872	0.871
1.032	0.903	0.9	0.897	0.895	0.878	0.878	0.876	0.877	0.876
1.034	0.907	0.904	0.902	0.9	0.885	0.885	0.882	0.883	0.882
1.036	0.911	0.908	0.906	0.903	0.891	0.891	0.888	0.888	0.886
1.038	0.914	0.912	0.91	0.908	0.898	0.897	0.895	0.894	0.893
1.04	0.918	0.916	0.914	0.912	0.906	0.905	0.902	0.901	0.899
1.042	0.921	0.919	0.917	0.916	0.913	0.913	0.909	0.908	0.905
1.044	0.923	0.922	0.921	0.919	0.92	0.919	0.916	0.915	0.912
1.046	0.925	0.924	0.923	0.922	0.927	0.926	0.923	0.921	0.918
1.048	0.929	0.928	0.926	0.926	0.935	0.934	0.931	0.928	0.926
1.05	0.931	0.931	0.93	0.929	0.943	0.941	0.939	0.936	0.933
1.052	0.933	0.933	0.933	0.933	0.949	0.949	0.946	0.943	0.939
1.054	0.936	0.937	0.936	0.936	0.957	0.956	0.953	0.95	0.947
1.056	0.939	0.939	0.94	0.94	0.965	0.964	0.961	0.958	0.955
1.058	0.943	0.943	0.943	0.944	0.973	0.971	0.969	0.965	0.962
1.06	0.947	0.947	0.948	0.949	0.98	0.98	0.977	0.973	0.97
1.062	0.95	0.952	0.952	0.953	0.988	0.987	0.985	0.981	0.977
1.064	0.955	0.956	0.957	0.958	0.996	0.994	0.993	0.988	0.985
1.066	0.96	0.962	0.962	0.964	1.003	1.002	1	0.996	0.993
1.068	0.966	0.968	0.969	0.97	1.011	1.01	1.009	1.004	1.001
1.07	0.973	0.974	0.975	0.976	1.019	1.018	1.017	1.011	1.008
1.072	0.98	0.981	0.982	0.983	1.027	1.026	1.025	1.019	1.015
1.074	0.987	0.989	0.99	0.991	1.034	1.033	1.032	1.026	1.023
1.076	0.996	0.998	0.998	0.999	1.042	1.041	1.04	1.033	1.03
1.078	1.005	1.006	1.007	1.008	1.05	1.048	1.048	1.041	1.037
1.08	1.016	1.017	1.016	1.016	1.058	1.056	1.055	1.048	1.044
1.082	1.026	1.026	1.026	1.025	1.065	1.063	1.063	1.055	1.051
1.084	1.037	1.036	1.035	1.035	1.071	1.069	1.069	1.061	1.058
1.086	1.048	1.048	1.046	1.045	1.078	1.076	1.076	1.067	1.064
1.088	1.06	1.058	1.056	1.054	1.085	1.082	1.082	1.073	1.07
1.09	1.072	1.07	1.067	1.064	1.091	1.088	1.089	1.079	1.076
1.092	1.083	1.08	1.076	1.073	1.096	1.093	1.093	1.084	1.08
1.094	1.095	1.09	1.086	1.083	1.102	1.098	1.099	1.089	1.086
1.096	1.104	1.099	1.095	1.09	1.106	1.102	1.103	1.092	1.09
1.098	1.114	1.109	1.104	1.099	1.11	1.106	1.107	1.097	1.094
1.1	1.122	1.117	1.111	1.106	1.112	1.108	1.11	1.1	1.097
1.102	1.13	1.124	1.118	1.113	1.115	1.112	1.113	1.102	1.1
1.104	1.136	1.129	1.123	1.118	1.116	1.113	1.114	1.104	1.102
1.106	1.14	1.134	1.128	1.122	1.118	1.114	1.116	1.107	1.105
1.108	1.142	1.136	1.13	1.125	1.117	1.114	1.116	1.107	1.106
1.11	1.143	1.136	1.131	1.126	1.115	1.113	1.115	1.107	1.106
1.112	1.142	1.136	1.132	1.127	1.114	1.112	1.114	1.107	1.106
1.114	1.139	1.135	1.13	1.126	1.113	1.111	1.113	1.107	1.106
1.116	1.136	1.132	1.128	1.125	1.111	1.109	1.111	1.106	1.106
1.118	1.13	1.127	1.124	1.121	1.107	1.106	1.108	1.104	1.105
1.12	1.123	1.121	1.12	1.118	1.103	1.103	1.105	1.102	1.103
1.122	1.116	1.115	1.114	1.113	1.1	1.101	1.103	1.101	1.102
1.124	1.108	1.108	1.109	1.109	1.097	1.098	1.1	1.099	1.101
1.126	1.099	1.1	1.102	1.102	1.093	1.094	1.097	1.097	1.098
1.128	1.091	1.093	1.095	1.097	1.09	1.092	1.094	1.095	1.097
1.13	1.082	1.085	1.089	1.091	1.087	1.089	1.09	1.092	1.094
1.132	1.075	1.079	1.083	1.086	1.084	1.086	1.088	1.091	1.093
1.134	1.067	1.072	1.076	1.08	1.081	1.083	1.085	1.088	1.091
1.136	1.062	1.067	1.072	1.075	1.079	1.082	1.083	1.087	1.09
1.138	1.057	1.063	1.067	1.072	1.079	1.081	1.082	1.085	1.088
1.14	1.054	1.059	1.064	1.068	1.077	1.08	1.081	1.084	1.087
1.142	1.052	1.057	1.061	1.066	1.077	1.079	1.08	1.083	1.086
1.144	1.051	1.056	1.061	1.064	1.077	1.079	1.08	1.083	1.085
1.146	1.052	1.056	1.06	1.064	1.078	1.079	1.08	1.082	1.084
1.148	1.054	1.059	1.061	1.065	1.079	1.08	1.081	1.082	1.084
1.15	1.057	1.061	1.063	1.066	1.081	1.081	1.082	1.082	1.084
1.152	1.063	1.065	1.067	1.068	1.083	1.082	1.083	1.084	1.084
1.154	1.068	1.07	1.071	1.072	1.085	1.084	1.085	1.084	1.085
1.156	1.074	1.074	1.074	1.075	1.087	1.085	1.086	1.084	1.084
1.158	1.081	1.08	1.079	1.079	1.089	1.086	1.088	1.085	1.084
1.16	1.088	1.087	1.085	1.084	1.091	1.088	1.089	1.085	1.085
1.162	1.095	1.093	1.09	1.089	1.093	1.089	1.091	1.086	1.085
1.164	1.101	1.098	1.095	1.093	1.094	1.09	1.091	1.085	1.084
1.166	1.108	1.104	1.1	1.098	1.095	1.09	1.092	1.086	1.084
1.168	1.113	1.108	1.104	1.1	1.094	1.089	1.091	1.084	1.083
1.17	1.117	1.113	1.108	1.104	1.094	1.089	1.092	1.084	1.082
1.172	1.121	1.115	1.11	1.106	1.092	1.088	1.09	1.082	1.081
1.174	1.122	1.117	1.112	1.108	1.09	1.085	1.088	1.08	1.079
1.176	1.122	1.117	1.113	1.108	1.087	1.082	1.085	1.077	1.076
1.178	1.121	1.116	1.112	1.107	1.082	1.079	1.081	1.074	1.073
1.18	1.119	1.114	1.109	1.106	1.077	1.074	1.077	1.071	1.07
1.182	1.115	1.11	1.106	1.102	1.071	1.068	1.072	1.066	1.066
1.184	1.109	1.104	1.101	1.098	1.065	1.062	1.065	1.061	1.062
1.186	1.102	1.098	1.096	1.093	1.057	1.055	1.059	1.055	1.056
1.188	1.093	1.09	1.088	1.086	1.05	1.048	1.051	1.049	1.051
1.19	1.083	1.081	1.08	1.078	1.04	1.04	1.043	1.043	1.045
1.192	1.072	1.071	1.071	1.07	1.032	1.032	1.035	1.036	1.038
1.194	1.06	1.06	1.061	1.061	1.022	1.024	1.027	1.028	1.031
1.196	1.049	1.049	1.051	1.051	1.013	1.015	1.018	1.021	1.025
1.198	1.036	1.037	1.04	1.041	1.004	1.006	1.009	1.013	1.018
1.2	1.023	1.025	1.029	1.03	0.995	0.998	1	1.006	1.011
1.202	1.01	1.013	1.017	1.019	0.985	0.989	0.991	0.998	1.004
1.204	0.997	1.001	1.006	1.009	0.977	0.981	0.983	0.991	0.997
1.206	0.984	0.989	0.994	0.998	0.968	0.973	0.975	0.984	0.989
1.208	0.974	0.979	0.985	0.989	0.961	0.967	0.967	0.978	0.984
1.21	0.963	0.968	0.974	0.978	0.954	0.959	0.96	0.971	0.977
1.212	0.953	0.959	0.965	0.969	0.948	0.953	0.953	0.965	0.971
1.214	0.944	0.95	0.956	0.961	0.942	0.948	0.948	0.96	0.966
1.216	0.936	0.943	0.948	0.953	0.937	0.943	0.942	0.954	0.96
1.218	0.931	0.937	0.942	0.947	0.933	0.939	0.938	0.95	0.956
1.22	0.926	0.932	0.937	0.942	0.931	0.936	0.935	0.947	0.952
1.222	0.922	0.927	0.932	0.937	0.928	0.933	0.932	0.943	0.948
1.224	0.919	0.924	0.929	0.933	0.927	0.932	0.93	0.941	0.946
1.226	0.918	0.922	0.927	0.931	0.926	0.931	0.928	0.94	0.943
1.228	0.918	0.921	0.925	0.929	0.926	0.931	0.929	0.939	0.942
1.23	0.918	0.921	0.925	0.928	0.927	0.931	0.928	0.938	0.941
1.232	0.921	0.923	0.926	0.929	0.929	0.933	0.93	0.939	0.941
1.234	0.923	0.925	0.927	0.929	0.931	0.935	0.932	0.94	0.941
1.236	0.926	0.927	0.929	0.931	0.934	0.937	0.934	0.941	0.942
1.238	0.929	0.93	0.932	0.933	0.937	0.94	0.936	0.942	0.943
1.24	0.933	0.933	0.934	0.935	0.941	0.943	0.939	0.944	0.944
1.242	0.938	0.938	0.938	0.939	0.945	0.947	0.944	0.948	0.947
1.244	0.943	0.942	0.942	0.942	0.949	0.951	0.947	0.952	0.95
1.246	0.947	0.947	0.946	0.946	0.954	0.955	0.952	0.954	0.952
1.248	0.952	0.951	0.95	0.949	0.959	0.96	0.956	0.958	0.956
1.25	0.957	0.956	0.954	0.954	0.965	0.965	0.961	0.962	0.959
1.252	0.961	0.959	0.958	0.957	0.969	0.969	0.966	0.966	0.963
1.254	0.967	0.965	0.963	0.962	0.975	0.974	0.971	0.971	0.968
1.256	0.971	0.969	0.967	0.966	0.98	0.979	0.976	0.975	0.971
1.258	0.974	0.973	0.971	0.969	0.985	0.984	0.981	0.98	0.975
1.26	0.978	0.976	0.974	0.973	0.99	0.988	0.986	0.984	0.98
1.262	0.981	0.98	0.978	0.977	0.995	0.993	0.991	0.989	0.984
1.264	0.984	0.983	0.982	0.98	1	0.998	0.995	0.993	0.988
1.266	0.988	0.987	0.986	0.984	1.004	1.002	1	0.997	0.993
1.268	0.991	0.99	0.988	0.988	1.008	1.006	1.005	1.002	0.997
1.27	0.994	0.993	0.992	0.991	1.012	1.01	1.008	1.005	1.001
1.272	0.997	0.997	0.995	0.995	1.017	1.014	1.013	1.01	1.005
1.274	0.999	1	0.999	0.998	1.02	1.017	1.016	1.013	1.009
1.276	1.003	1.003	1.002	1.002	1.023	1.021	1.019	1.017	1.012
1.278	1.006	1.006	1.006	1.005	1.027	1.024	1.023	1.02	1.016
1.28	1.011	1.011	1.01	1.009	1.031	1.028	1.027	1.024	1.02
1.282	1.014	1.015	1.013	1.013	1.033	1.03	1.029	1.027	1.023
1.284	1.019	1.018	1.017	1.017	1.036	1.033	1.032	1.03	1.026
1.286	1.023	1.023	1.022	1.021	1.039	1.036	1.036	1.033	1.029
1.288	1.027	1.027	1.025	1.024	1.041	1.038	1.038	1.035	1.031
1.29	1.033	1.032	1.03	1.029	1.044	1.041	1.041	1.038	1.034
1.292	1.037	1.036	1.034	1.032	1.046	1.043	1.042	1.039	1.036
1.294	1.042	1.04	1.038	1.036	1.048	1.045	1.044	1.041	1.038
1.296	1.046	1.044	1.041	1.039	1.049	1.046	1.046	1.042	1.039
1.298	1.05	1.048	1.045	1.043	1.051	1.048	1.047	1.044	1.04
1.3	1.054	1.051	1.048	1.045	1.052	1.048	1.048	1.044	1.041
1.302	1.057	1.054	1.05	1.047	1.053	1.049	1.049	1.045	1.042
1.304	1.059	1.055	1.052	1.048	1.053	1.049	1.049	1.045	1.042
1.306	1.06	1.056	1.052	1.049	1.052	1.048	1.049	1.044	1.042
1.308	1.061	1.057	1.053	1.049	1.052	1.047	1.048	1.043	1.041
1.31	1.059	1.055	1.051	1.048	1.049	1.045	1.046	1.042	1.04
1.312	1.056	1.053	1.049	1.046	1.047	1.043	1.045	1.04	1.038
1.314	1.054	1.05	1.047	1.044	1.045	1.041	1.043	1.038	1.036
1.316	1.048	1.045	1.042	1.039	1.041	1.037	1.039	1.035	1.033
1.318	1.042	1.039	1.037	1.034	1.036	1.033	1.036	1.031	1.03
1.32	1.035	1.033	1.031	1.029	1.031	1.029	1.031	1.027	1.027
1.322	1.026	1.025	1.024	1.023	1.025	1.023	1.026	1.022	1.023
1.324	1.016	1.016	1.015	1.015	1.018	1.017	1.02	1.017	1.018
1.326	1.006	1.006	1.007	1.007	1.012	1.011	1.014	1.012	1.013
1.328	0.995	0.996	0.998	0.998	1.004	1.004	1.007	1.006	1.008
1.33	0.983	0.985	0.987	0.988	0.996	0.996	0.999	0.999	1.002
1.332	0.971	0.974	0.977	0.979	0.988	0.989	0.992	0.993	0.996
1.334	0.959	0.962	0.966	0.969	0.979	0.98	0.984	0.986	0.99
1.336	0.947	0.951	0.955	0.959	0.97	0.973	0.976	0.979	0.983
1.338	0.935	0.939	0.944	0.948	0.962	0.964	0.968	0.972	0.977
1.34	0.924	0.929	0.934	0.939	0.954	0.956	0.96	0.965	0.971
1.342	0.912	0.918	0.924	0.929	0.945	0.948	0.952	0.958	0.964
1.344	0.902	0.909	0.915	0.921	0.937	0.941	0.944	0.952	0.958
1.346	0.893	0.9	0.906	0.912	0.929	0.934	0.937	0.945	0.951
1.348	0.885	0.892	0.899	0.905	0.923	0.928	0.93	0.94	0.946
1.35	0.878	0.885	0.892	0.899	0.916	0.922	0.924	0.934	0.94
1.352	0.873	0.88	0.887	0.894	0.911	0.917	0.919	0.929	0.935
1.354	0.869	0.876	0.883	0.889	0.907	0.913	0.914	0.925	0.93
1.356	0.867	0.874	0.881	0.886	0.903	0.909	0.91	0.921	0.927
1.358	0.867	0.874	0.879	0.885	0.901	0.907	0.907	0.918	0.924
1.36	0.868	0.874	0.88	0.885	0.899	0.905	0.904	0.915	0.921
1.362	0.871	0.876	0.881	0.886	0.899	0.904	0.903	0.914	0.919
1.364	0.876	0.88	0.885	0.889	0.9	0.904	0.903	0.913	0.918
1.366	0.882	0.886	0.889	0.893	0.901	0.905	0.904	0.913	0.917
1.368	0.889	0.892	0.895	0.898	0.903	0.907	0.905	0.913	0.917
1.37	0.898	0.9	0.902	0.904	0.906	0.91	0.908	0.915	0.918
1.372	0.908	0.909	0.91	0.911	0.91	0.913	0.911	0.917	0.919
1.374	0.919	0.919	0.919	0.919	0.915	0.918	0.915	0.92	0.921
1.376	0.931	0.929	0.928	0.928	0.92	0.922	0.919	0.922	0.923
1.378	0.943	0.94	0.939	0.937	0.926	0.927	0.924	0.926	0.926
1.38	0.954	0.951	0.949	0.946	0.931	0.932	0.929	0.93	0.929
1.382	0.968	0.963	0.96	0.956	0.938	0.939	0.936	0.935	0.933
1.384	0.979	0.974	0.97	0.966	0.944	0.944	0.941	0.939	0.937
1.386	0.99	0.985	0.98	0.976	0.951	0.95	0.947	0.944	0.942
1.388	1	0.994	0.989	0.984	0.957	0.956	0.953	0.949	0.946
1.39	1.011	1.004	0.999	0.994	0.964	0.962	0.959	0.954	0.951
1.392	1.019	1.012	1.007	1.001	0.969	0.967	0.965	0.959	0.955
1.394	1.027	1.02	1.015	1.009	0.976	0.973	0.971	0.964	0.96
1.396	1.033	1.026	1.021	1.015	0.98	0.978	0.976	0.968	0.964
1.398	1.039	1.032	1.027	1.021	0.985	0.982	0.981	0.973	0.969
1.4	1.043	1.037	1.032	1.026	0.989	0.987	0.985	0.977	0.974
1.402	1.045	1.04	1.035	1.03	0.993	0.99	0.989	0.981	0.978
1.404	1.047	1.042	1.038	1.034	0.996	0.993	0.992	0.985	0.981
1.406	1.048	1.044	1.04	1.037	0.999	0.996	0.995	0.988	0.985
1.408	1.048	1.045	1.042	1.038	1.001	0.999	0.998	0.991	0.988
1.41	1.048	1.045	1.042	1.039	1.003	1.001	1.001	0.994	0.992
1.412	1.047	1.044	1.042	1.04	1.004	1.002	1.003	0.997	0.995
1.414	1.044	1.043	1.041	1.04	1.005	1.004	1.003	0.998	0.997
1.416	1.042	1.042	1.041	1.039	1.006	1.005	1.005	1.001	1
1.418	1.04	1.04	1.039	1.039	1.007	1.006	1.006	1.002	1.001
1.42	1.038	1.038	1.038	1.038	1.007	1.007	1.007	1.004	1.003
1.422	1.035	1.036	1.037	1.036	1.007	1.007	1.008	1.005	1.005
1.424	1.034	1.035	1.036	1.036	1.008	1.009	1.008	1.007	1.007
1.426	1.032	1.033	1.034	1.034	1.008	1.009	1.009	1.008	1.008
1.428	1.031	1.032	1.033	1.034	1.009	1.01	1.01	1.009	1.01
1.43	1.03	1.031	1.032	1.033	1.01	1.011	1.011	1.011	1.011
1.432	1.03	1.031	1.032	1.033	1.012	1.012	1.012	1.012	1.013
1.434	1.029	1.03	1.031	1.032	1.013	1.013	1.013	1.013	1.014
1.436	1.03	1.03	1.031	1.032	1.015	1.015	1.014	1.015	1.015
1.438	1.03	1.031	1.032	1.032	1.017	1.017	1.017	1.017	1.017
1.44	1.031	1.031	1.032	1.032	1.018	1.019	1.018	1.018	1.018
1.442	1.033	1.033	1.033	1.032	1.021	1.021	1.02	1.02	1.019
1.444	1.034	1.034	1.033	1.033	1.023	1.023	1.022	1.021	1.021
1.446	1.036	1.035	1.034	1.033	1.026	1.025	1.025	1.023	1.023
1.448	1.036	1.035	1.034	1.033	1.028	1.027	1.027	1.025	1.024
1.45	1.037	1.036	1.035	1.033	1.03	1.03	1.029	1.027	1.026
1.452	1.037	1.036	1.034	1.033	1.032	1.031	1.031	1.028	1.027
1.454	1.038	1.036	1.035	1.033	1.035	1.034	1.033	1.029	1.028
1.456	1.038	1.035	1.034	1.032	1.036	1.035	1.035	1.031	1.029
1.458	1.037	1.035	1.033	1.032	1.038	1.037	1.037	1.032	1.03
1.46	1.035	1.033	1.031	1.03	1.039	1.037	1.038	1.033	1.031
1.462	1.032	1.03	1.029	1.028	1.04	1.038	1.039	1.033	1.032
1.464	1.029	1.027	1.026	1.025	1.04	1.038	1.04	1.034	1.032
1.466	1.025	1.024	1.023	1.022	1.04	1.038	1.04	1.034	1.032
1.468	1.02	1.019	1.018	1.018	1.04	1.038	1.039	1.034	1.032
1.47	1.014	1.014	1.014	1.014	1.039	1.037	1.039	1.033	1.031
1.472	1.009	1.009	1.009	1.009	1.037	1.035	1.037	1.032	1.031
1.474	1.002	1.003	1.003	1.004	1.035	1.033	1.036	1.031	1.029
1.476	0.995	0.996	0.997	0.999	1.032	1.031	1.034	1.029	1.028
1.478	0.987	0.99	0.992	0.993	1.029	1.028	1.03	1.026	1.026
1.48	0.981	0.984	0.985	0.987	1.025	1.025	1.028	1.024	1.024
1.482	0.973	0.976	0.979	0.982	1.021	1.021	1.024	1.021	1.022
1.484	0.967	0.97	0.973	0.976	1.017	1.017	1.021	1.018	1.019
1.486	0.96	0.964	0.967	0.971	1.012	1.013	1.016	1.015	1.016
1.488	0.954	0.959	0.962	0.965	1.008	1.009	1.012	1.011	1.013
1.49	0.948	0.953	0.956	0.96	1.003	1.004	1.007	1.008	1.009
1.492	0.943	0.948	0.952	0.955	0.998	1	1.002	1.004	1.006
1.494	0.939	0.944	0.947	0.951	0.993	0.995	0.998	1	1.002
1.496	0.936	0.941	0.944	0.948	0.989	0.991	0.994	0.996	0.999
1.498	0.933	0.937	0.94	0.944	0.984	0.986	0.989	0.992	0.995
1.5	0.931	0.935	0.938	0.941	0.979	0.982	0.985	0.988	0.991
1.502	0.93	0.933	0.936	0.939	0.975	0.978	0.98	0.985	0.988
1.504	0.929	0.932	0.935	0.938	0.972	0.974	0.976	0.981	0.984
1.506	0.929	0.931	0.933	0.936	0.968	0.97	0.972	0.977	0.981
1.508	0.929	0.931	0.933	0.936	0.964	0.967	0.969	0.974	0.978
1.51	0.93	0.931	0.933	0.935	0.962	0.964	0.965	0.971	0.975
1.512	0.931	0.932	0.934	0.936	0.959	0.962	0.963	0.969	0.972
1.514	0.932	0.934	0.935	0.936	0.957	0.96	0.96	0.966	0.969
1.516	0.934	0.935	0.936	0.937	0.955	0.957	0.958	0.964	0.967
1.518	0.937	0.937	0.938	0.938	0.954	0.956	0.956	0.962	0.965
1.52	0.939	0.939	0.94	0.94	0.953	0.954	0.954	0.96	0.963
1.522	0.942	0.941	0.942	0.942	0.952	0.954	0.954	0.959	0.962
1.524	0.944	0.944	0.944	0.944	0.951	0.953	0.953	0.958	0.961
1.526	0.947	0.947	0.947	0.947	0.952	0.954	0.953	0.958	0.96
1.528	0.95	0.949	0.949	0.949	0.952	0.954	0.952	0.957	0.959
1.53	0.953	0.952	0.953	0.952	0.953	0.954	0.953	0.958	0.96
1.532	0.956	0.955	0.955	0.954	0.953	0.955	0.953	0.958	0.959
1.534	0.959	0.958	0.958	0.957	0.955	0.957	0.955	0.959	0.96
1.536	0.962	0.962	0.961	0.961	0.957	0.958	0.956	0.96	0.961
1.538	0.965	0.965	0.964	0.964	0.959	0.96	0.958	0.961	0.962
1.54	0.969	0.969	0.969	0.968	0.961	0.962	0.96	0.963	0.964
1.542	0.973	0.972	0.972	0.971	0.964	0.965	0.962	0.965	0.966
1.544	0.976	0.976	0.976	0.975	0.967	0.968	0.965	0.968	0.968
1.546	0.98	0.98	0.98	0.979	0.97	0.971	0.968	0.971	0.97
1.548	0.984	0.984	0.984	0.984	0.974	0.975	0.972	0.974	0.973
1.55	0.989	0.989	0.989	0.988	0.978	0.979	0.976	0.977	0.976
1.552	0.994	0.993	0.993	0.993	0.982	0.983	0.979	0.981	0.98
1.554	0.999	0.999	0.999	0.998	0.987	0.987	0.984	0.985	0.983
1.556	1.005	1.005	1.005	1.004	0.992	0.992	0.989	0.989	0.987
1.558	1.011	1.01	1.01	1.01	0.998	0.997	0.994	0.994	0.991
1.56	1.018	1.017	1.016	1.016	1.004	1.003	0.999	0.999	0.996
1.562	1.025	1.024	1.023	1.022	1.009	1.008	1.005	1.004	1
1.564	1.032	1.031	1.03	1.028	1.015	1.014	1.01	1.009	1.005
1.566	1.04	1.039	1.037	1.035	1.021	1.019	1.016	1.014	1.01
1.568	1.049	1.047	1.044	1.042	1.028	1.026	1.022	1.019	1.015
1.57	1.057	1.054	1.052	1.049	1.033	1.031	1.027	1.024	1.019
1.572	1.066	1.063	1.059	1.056	1.04	1.037	1.034	1.029	1.024
1.574	1.074	1.07	1.066	1.063	1.045	1.042	1.039	1.034	1.029
1.576	1.082	1.078	1.073	1.07	1.051	1.047	1.045	1.039	1.033
1.578	1.09	1.085	1.081	1.076	1.056	1.052	1.049	1.044	1.038
1.58	1.097	1.092	1.087	1.083	1.061	1.057	1.054	1.048	1.042
1.582	1.103	1.098	1.092	1.088	1.065	1.061	1.058	1.052	1.046
1.584	1.108	1.103	1.098	1.093	1.068	1.064	1.063	1.055	1.05
1.586	1.113	1.108	1.102	1.097	1.072	1.067	1.066	1.059	1.053
1.588	1.116	1.11	1.105	1.101	1.074	1.07	1.069	1.061	1.056
1.59	1.118	1.113	1.108	1.103	1.076	1.072	1.071	1.064	1.059
1.592	1.119	1.114	1.109	1.105	1.077	1.073	1.072	1.066	1.061
1.594	1.119	1.114	1.109	1.106	1.077	1.074	1.074	1.068	1.063
1.596	1.116	1.112	1.109	1.105	1.077	1.074	1.074	1.069	1.065
1.598	1.114	1.111	1.108	1.105	1.076	1.074	1.074	1.069	1.066
1.6	1.11	1.107	1.105	1.103	1.075	1.073	1.074	1.069	1.066
1.602	1.105	1.104	1.102	1.101	1.073	1.072	1.073	1.069	1.067
1.604	1.1	1.099	1.098	1.098	1.071	1.07	1.071	1.069	1.067
1.606	1.094	1.094	1.094	1.094	1.069	1.068	1.07	1.068	1.067
1.608	1.087	1.089	1.089	1.09	1.066	1.066	1.068	1.067	1.066
1.61	1.082	1.083	1.085	1.086	1.064	1.064	1.066	1.066	1.066
1.612	1.076	1.078	1.081	1.082	1.061	1.062	1.064	1.065	1.065
1.614	1.07	1.073	1.076	1.077	1.059	1.06	1.061	1.063	1.064
1.616	1.065	1.069	1.072	1.074	1.057	1.059	1.06	1.062	1.063
1.618	1.061	1.065	1.068	1.07	1.055	1.057	1.058	1.061	1.062
1.62	1.057	1.061	1.064	1.067	1.054	1.055	1.056	1.059	1.06
1.622	1.055	1.058	1.061	1.063	1.052	1.054	1.055	1.058	1.059
1.624	1.052	1.055	1.058	1.06	1.051	1.053	1.053	1.057	1.058
1.626	1.052	1.054	1.056	1.059	1.051	1.052	1.053	1.056	1.058
1.628	1.051	1.053	1.055	1.057	1.051	1.052	1.052	1.055	1.057
1.63	1.051	1.052	1.054	1.055	1.051	1.052	1.052	1.054	1.056
1.632	1.051	1.052	1.053	1.054	1.052	1.052	1.052	1.054	1.055
1.634	1.052	1.052	1.053	1.053	1.052	1.052	1.052	1.053	1.054
1.636	1.053	1.053	1.052	1.053	1.053	1.053	1.053	1.053	1.054
1.638	1.054	1.052	1.052	1.052	1.054	1.053	1.053	1.052	1.053
1.64	1.054	1.053	1.052	1.051	1.055	1.053	1.053	1.052	1.053
1.642	1.055	1.053	1.051	1.051	1.056	1.054	1.054	1.052	1.052
1.644	1.054	1.052	1.051	1.05	1.056	1.053	1.054	1.051	1.052
1.646	1.053	1.051	1.049	1.048	1.055	1.053	1.054	1.05	1.05
1.648	1.051	1.049	1.047	1.046	1.055	1.052	1.053	1.049	1.049
1.65	1.049	1.047	1.045	1.044	1.054	1.051	1.052	1.048	1.048
1.652	1.045	1.044	1.042	1.041	1.052	1.049	1.05	1.046	1.046
1.654	1.041	1.04	1.038	1.038	1.05	1.047	1.049	1.045	1.045
1.656	1.036	1.035	1.034	1.033	1.047	1.044	1.046	1.043	1.043
1.658	1.03	1.03	1.029	1.029	1.044	1.041	1.044	1.04	1.04
1.66	1.023	1.024	1.023	1.024	1.039	1.037	1.04	1.036	1.037
1.662	1.016	1.017	1.017	1.018	1.034	1.033	1.036	1.033	1.034
1.664	1.009	1.01	1.011	1.011	1.029	1.028	1.031	1.029	1.03
1.666	1	1.002	1.004	1.005	1.023	1.022	1.026	1.024	1.026
1.668	0.992	0.994	0.996	0.998	1.016	1.017	1.02	1.019	1.022
1.67	0.983	0.986	0.988	0.99	1.01	1.01	1.014	1.014	1.017
1.672	0.974	0.977	0.98	0.982	1.003	1.004	1.007	1.009	1.012
1.674	0.965	0.969	0.972	0.975	0.996	0.997	1.001	1.004	1.007
1.676	0.956	0.96	0.963	0.966	0.988	0.99	0.994	0.997	1.001
1.678	0.948	0.951	0.955	0.958	0.981	0.984	0.987	0.992	0.996
1.68	0.938	0.942	0.946	0.95	0.973	0.976	0.98	0.985	0.99
1.682	0.93	0.934	0.938	0.942	0.966	0.969	0.973	0.979	0.984
1.684	0.921	0.925	0.93	0.934	0.959	0.962	0.966	0.973	0.978
1.686	0.913	0.918	0.922	0.927	0.952	0.956	0.96	0.967	0.972
1.688	0.906	0.91	0.915	0.92	0.945	0.95	0.953	0.961	0.966
1.69	0.898	0.903	0.908	0.913	0.94	0.944	0.947	0.955	0.961
1.692	0.892	0.896	0.902	0.907	0.934	0.938	0.941	0.949	0.955
1.694	0.886	0.89	0.896	0.901	0.929	0.934	0.935	0.944	0.95
1.696	0.88	0.885	0.891	0.896	0.924	0.928	0.93	0.939	0.945
1.698	0.876	0.881	0.886	0.891	0.92	0.925	0.926	0.935	0.941
1.7	0.872	0.878	0.883	0.888	0.916	0.921	0.922	0.931	0.936
1.702	0.869	0.874	0.879	0.884	0.913	0.917	0.918	0.927	0.932
1.704	0.868	0.873	0.878	0.882	0.911	0.915	0.915	0.924	0.929
1.706	0.867	0.872	0.876	0.881	0.908	0.912	0.912	0.92	0.925
1.708	0.868	0.873	0.877	0.881	0.907	0.911	0.911	0.919	0.923
1.71	0.87	0.874	0.877	0.881	0.906	0.909	0.909	0.917	0.92
1.712	0.873	0.876	0.879	0.883	0.906	0.909	0.908	0.915	0.919
1.714	0.877	0.88	0.882	0.885	0.906	0.908	0.907	0.915	0.918
1.716	0.882	0.884	0.886	0.889	0.907	0.909	0.908	0.914	0.917
1.718	0.888	0.889	0.891	0.892	0.907	0.909	0.908	0.914	0.916
1.72	0.895	0.896	0.896	0.898	0.909	0.911	0.909	0.915	0.916
1.722	0.903	0.903	0.903	0.903	0.911	0.913	0.91	0.916	0.917
1.724	0.911	0.911	0.91	0.91	0.914	0.915	0.912	0.917	0.918
1.726	0.92	0.919	0.918	0.917	0.916	0.917	0.915	0.919	0.919
1.728	0.93	0.928	0.925	0.924	0.92	0.92	0.918	0.921	0.921
1.73	0.94	0.937	0.934	0.932	0.924	0.924	0.921	0.924	0.923
1.732	0.95	0.946	0.943	0.94	0.927	0.928	0.925	0.927	0.926
1.734	0.96	0.956	0.952	0.949	0.932	0.932	0.929	0.93	0.929
1.736	0.97	0.965	0.961	0.957	0.937	0.937	0.933	0.934	0.932
1.738	0.98	0.975	0.97	0.966	0.942	0.941	0.938	0.938	0.935
1.74	0.989	0.984	0.979	0.974	0.947	0.946	0.943	0.943	0.939
1.742	0.999	0.992	0.988	0.982	0.953	0.952	0.948	0.947	0.943
1.744	1.006	1	0.995	0.99	0.958	0.957	0.953	0.951	0.948
1.746	1.014	1.008	1.003	0.997	0.964	0.962	0.959	0.956	0.952
1.748	1.021	1.015	1.01	1.004	0.97	0.968	0.964	0.961	0.957
1.75	1.027	1.021	1.016	1.01	0.975	0.973	0.97	0.966	0.961
1.752	1.033	1.027	1.022	1.016	0.981	0.979	0.976	0.971	0.966
1.754	1.037	1.031	1.026	1.021	0.986	0.984	0.981	0.975	0.97
1.756	1.04	1.035	1.03	1.025	0.992	0.989	0.986	0.98	0.975
1.758	1.043	1.038	1.033	1.029	0.997	0.994	0.992	0.985	0.979
1.76	1.044	1.04	1.036	1.031	1.002	0.999	0.996	0.989	0.984
1.762	1.045	1.041	1.037	1.033	1.006	1.003	1.001	0.993	0.988
1.764	1.044	1.042	1.038	1.035	1.01	1.007	1.005	0.997	0.993
1.766	1.044	1.041	1.038	1.036	1.013	1.011	1.009	1.001	0.996
1.768	1.042	1.04	1.038	1.036	1.016	1.014	1.012	1.004	1
1.77	1.04	1.039	1.037	1.035	1.019	1.017	1.016	1.007	1.003
1.772	1.037	1.037	1.036	1.035	1.021	1.019	1.018	1.01	1.006
1.774	1.034	1.034	1.034	1.033	1.023	1.02	1.02	1.012	1.009
1.776	1.031	1.032	1.031	1.031	1.024	1.022	1.022	1.014	1.011
1.778	1.028	1.029	1.029	1.03	1.025	1.023	1.024	1.016	1.014
1.78	1.024	1.026	1.026	1.027	1.025	1.024	1.024	1.017	1.015
1.782	1.021	1.023	1.024	1.025	1.025	1.024	1.025	1.019	1.017
1.784	1.018	1.02	1.022	1.023	1.025	1.024	1.025	1.019	1.018
1.786	1.015	1.018	1.019	1.021	1.024	1.024	1.025	1.019	1.019
1.788	1.012	1.015	1.017	1.018	1.023	1.023	1.024	1.02	1.019
1.79	1.011	1.013	1.015	1.016	1.023	1.022	1.024	1.02	1.02
1.792	1.008	1.011	1.013	1.015	1.021	1.021	1.023	1.019	1.02
1.794	1.007	1.009	1.011	1.013	1.02	1.02	1.022	1.019	1.02
1.796	1.006	1.008	1.009	1.011	1.018	1.019	1.021	1.018	1.019
1.798	1.005	1.007	1.008	1.01	1.018	1.018	1.02	1.017	1.019
1.8	1.005	1.006	1.007	1.009	1.016	1.017	1.018	1.017	1.018
1.802	1.005	1.005	1.007	1.008	1.015	1.015	1.017	1.016	1.018
1.804	1.005	1.005	1.006	1.007	1.013	1.014	1.016	1.015	1.017
1.806	1.004	1.005	1.006	1.007	1.011	1.013	1.014	1.013	1.015
1.808	1.005	1.005	1.006	1.006	1.01	1.011	1.013	1.012	1.015
1.81	1.005	1.005	1.005	1.006	1.009	1.01	1.011	1.011	1.014
1.812	1.005	1.005	1.005	1.006	1.008	1.009	1.01	1.01	1.013
1.814	1.006	1.005	1.006	1.006	1.007	1.007	1.009	1.01	1.012
1.816	1.006	1.005	1.006	1.006	1.005	1.007	1.008	1.009	1.01
1.818	1.006	1.006	1.006	1.006	1.005	1.006	1.007	1.008	1.01
1.82	1.007	1.006	1.006	1.006	1.004	1.005	1.005	1.007	1.009
1.822	1.006	1.006	1.005	1.006	1.003	1.003	1.004	1.006	1.007
1.824	1.006	1.006	1.006	1.005	1.002	1.003	1.003	1.005	1.007
1.826	1.006	1.006	1.006	1.006	1.002	1.002	1.003	1.005	1.006
1.828	1.006	1.006	1.006	1.006	1.001	1.002	1.002	1.004	1.006
1.83	1.005	1.005	1.005	1.005	1	1.001	1.001	1.003	1.005
1.832	1.005	1.005	1.005	1.005	1	1.001	1.001	1.003	1.005
1.834	1.005	1.005	1.005	1.005	1	1	1.001	1.003	1.004
1.836	1.005	1.005	1.005	1.005	1	1	1	1.003	1.004
1.838	1.005	1.005	1.005	1.005	1	1.001	1.001	1.003	1.004
1.84	1.004	1.005	1.005	1.005	1.001	1.001	1.001	1.003	1.004
1.842	1.004	1.005	1.005	1.005	1.001	1.001	1.001	1.003	1.003
1.844	1.005	1.005	1.006	1.006	1.002	1.002	1.001	1.004	1.004
1.846	1.005	1.005	1.006	1.006	1.002	1.002	1.002	1.004	1.004
1.848	1.005	1.006	1.006	1.007	1.003	1.003	1.003	1.005	1.005
1.85	1.006	1.007	1.007	1.007	1.005	1.004	1.004	1.006	1.006
1.852	1.007	1.008	1.008	1.009	1.006	1.006	1.005	1.007	1.006
1.854	1.008	1.009	1.009	1.009	1.008	1.007	1.006	1.007	1.007
1.856	1.01	1.01	1.01	1.011	1.009	1.009	1.008	1.009	1.008
1.858	1.011	1.012	1.012	1.012	1.011	1.01	1.01	1.01	1.009
1.86	1.014	1.014	1.014	1.014	1.013	1.012	1.012	1.012	1.01
1.862	1.016	1.016	1.016	1.016	1.015	1.014	1.013	1.013	1.012
1.864	1.019	1.019	1.018	1.018	1.017	1.016	1.015	1.014	1.013
1.866	1.021	1.021	1.02	1.02	1.019	1.018	1.017	1.016	1.014
1.868	1.024	1.024	1.023	1.022	1.021	1.02	1.019	1.017	1.016
1.87	1.028	1.026	1.025	1.024	1.023	1.021	1.021	1.018	1.017
1.872	1.031	1.03	1.029	1.027	1.025	1.023	1.023	1.02	1.018
1.874	1.034	1.033	1.031	1.029	1.027	1.025	1.025	1.021	1.019
1.876	1.037	1.035	1.033	1.031	1.028	1.026	1.026	1.022	1.02
1.878	1.039	1.037	1.034	1.033	1.029	1.027	1.027	1.023	1.021
1.88	1.042	1.039	1.036	1.034	1.03	1.028	1.029	1.024	1.022
1.882	1.043	1.04	1.037	1.035	1.031	1.029	1.029	1.024	1.022
1.884	1.044	1.04	1.038	1.035	1.031	1.029	1.029	1.024	1.022
1.886	1.044	1.04	1.037	1.035	1.031	1.029	1.03	1.024	1.023
1.888	1.042	1.039	1.036	1.033	1.03	1.027	1.029	1.023	1.022
1.89	1.04	1.037	1.034	1.032	1.028	1.026	1.028	1.022	1.021
1.892	1.037	1.033	1.031	1.029	1.026	1.024	1.026	1.021	1.02
1.894	1.032	1.029	1.027	1.025	1.023	1.022	1.024	1.019	1.018
1.896	1.026	1.024	1.022	1.021	1.02	1.019	1.021	1.016	1.017
1.898	1.019	1.017	1.016	1.015	1.016	1.015	1.018	1.014	1.014
1.9	1.01	1.01	1.009	1.009	1.012	1.011	1.014	1.011	1.011
1.902	1.001	1.001	1.002	1.002	1.006	1.006	1.009	1.007	1.008
1.904	0.991	0.992	0.993	0.994	1.001	1.002	1.004	1.003	1.005
1.906	0.979	0.981	0.984	0.986	0.995	0.996	0.999	0.999	1.001
1.908	0.968	0.971	0.974	0.977	0.989	0.99	0.994	0.994	0.997
1.91	0.956	0.96	0.964	0.968	0.982	0.984	0.988	0.989	0.993
1.912	0.944	0.95	0.955	0.959	0.976	0.978	0.982	0.985	0.989
1.914	0.932	0.939	0.945	0.949	0.969	0.972	0.975	0.98	0.984
1.916	0.921	0.928	0.935	0.941	0.962	0.966	0.969	0.974	0.979
1.918	0.911	0.919	0.926	0.932	0.956	0.96	0.962	0.97	0.975
1.92	0.902	0.91	0.918	0.924	0.95	0.955	0.957	0.965	0.97
1.922	0.894	0.902	0.91	0.917	0.944	0.949	0.951	0.96	0.966
1.924	0.887	0.896	0.904	0.911	0.939	0.944	0.946	0.956	0.962
1.926	0.882	0.89	0.898	0.906	0.934	0.94	0.941	0.952	0.957
1.928	0.879	0.887	0.894	0.901	0.93	0.936	0.937	0.948	0.954
1.93	0.878	0.885	0.892	0.899	0.928	0.934	0.934	0.946	0.951
1.932	0.878	0.885	0.891	0.897	0.926	0.932	0.931	0.943	0.948
1.934	0.88	0.886	0.892	0.897	0.925	0.93	0.929	0.941	0.946
1.936	0.884	0.888	0.894	0.898	0.925	0.93	0.929	0.94	0.944
1.938	0.889	0.893	0.897	0.901	0.926	0.931	0.928	0.94	0.944
1.94			0.813	0.905			0.929	0.94	0.943
1.942								0.767	0.944
1.944									0.74
